# Supplementary material for: Dissecting the journey to breast cancer diagnosis in sub‐Saharan Africa: Findings from the multicountry ABC‐DO cohort study
Source: PubMed Central journal article supplement — Int J Cancer. 2020 Aug 4;148(2):340–51. doi: 10.1002/ijc.33209 (PMC7754476; doi:10.1002/ijc.33209), 2020-08-04

## SUPPLEMENTARY MATERIAL

### Dissecting the journey to breast cancer diagnosis in sub-Saharan Africa: Findings from the multi-country ABC-DO cohort study

Milena Foerster<sup>1†\*</sup>, Fiona McKenzie<sup>1\*†</sup>, Annelle Zietsman<sup>2</sup>, Moses Galukande<sup>3</sup>, Angelica Anele<sup>4</sup>, Charles Adisa<sup>5</sup>, Groesbeck Parham<sup>6</sup>, Leeya Pinder<sup>7</sup>, Joachim Schüz<sup>1</sup>, Valerie McCormack<sup>1</sup>, Isabel dos-Santos-Silva<sup>8</sup>

*[The reference nos. correspond to those in the reference list of the paper]*

#### Table of Contents

1. Supplementary Materials & Methods ... page 2
2. Supplementary Table. Main characteristics of studies that reported on the length of the pre-diagnostic journey, or on its pre- and post-contact components, in North America and in sub-Saharan Africa ... page 3
3. Supplementary Figure 1. Comparison of the lengths of the diagnostic journey for ABC-DO women with published estimates from North America, a high-income region with a sizeable Black population, and sub-Saharan Africa ... page 6
4. Supplementary Figure 2. Comparison of the lengths of the pre-contact interval in the ABC-DO study populations with published estimates from North America, a high-income region with a sizeable Black population, and from sub-Saharan Africa. ... page 7
5. Supplementary Figure 3. Comparison of the lengths of the post-contact interval in the ABC-DO study populations with published estimates from North America, a high-income region with a sizeable Black population, and from sub-Saharan Africa ... page 8

## Supplementary Materials & Methods

To compare the findings from the ABC-DO study with those from previously published studies from Sub-Saharan Africa (SSA) we updated the findings from a recently published systematic review by Espina et al. (5) to the end of 2018 using a similar methodology. Briefly, the electronic databases MEDLINE, Embase and Global Health were searched using relevant terms and subject headings (e.g. “breast cancer”, “delay\*”, “late”, “poor”, “diagnosis”, “presentation”) and the Boolean operators “AND” and “OR”. No language restrictions were imposed. Articles were eligible for inclusion if they reported findings from primary research studies conducted in sub-Saharan Africa; reported on delays in presentation, diagnosis of female breast cancer patients; and were published between 1 January 2000 and 31 December 2018. Potentially relevant articles were searched in the electronic databases MEDLINE, Embase, and Global Health. All titles and abstracts were screened to identify potentially eligible articles and the full-text for these retrieved and reviewed to assess their eligibility and, if eligible, to extract relevant data. Because the no. of eligible studies was small, studies that reported on delays to treatment initiation rather than on delays to diagnosis were also included.

To provide a high-income perspective we also searched Medline to identify relevant studies conducted in North America, the only high-income region with a sizeable Black population. A search methodology similar to that described above was used, with no time or language restrictions imposed. Articles were eligible for inclusion if they reported findings from primary research studies conducted in the USA or Canada; reported on delays in presentation, final diagnosis and/or treatment initiation of female breast cancer patients, and were published before 1 January 2018. Articles were excluded if their study population comprised predominantly screen-detected breast cancer patients as their findings would not have been comparable to those from SSA settings where screening is rarely available (see Results section).

The main characteristics of the eligible studies are given in Supplementary Table 1. Study specific lengths of the pre-diagnostic journey, and of the pre- and post-contact intervals, are displayed in Figure 5 and Supplementary Figures 1 and 2, respectively.

**Supplementary Table.** Main characteristics of studies that reported on the length of the pre-diagnostic journey, or on its pre- and post-contact components, in North America and in sub-Saharan Africa

| Author, yr. of publication (ref. no.) <sup>a</sup> | Country/region                                       | Setting                                                           | Year of study                            | Eligibility criteria                                                                                        | Sample size                                                                                     |
|----------------------------------------------------|------------------------------------------------------|-------------------------------------------------------------------|------------------------------------------|-------------------------------------------------------------------------------------------------------------|-------------------------------------------------------------------------------------------------|
| <b>NORTH AMERICA</b>                               |                                                      |                                                                   |                                          |                                                                                                             |                                                                                                 |
| Potts, 1928 (11)                                   | USA, Chicago                                         | Presbyterian Hospital of Chicago                                  | 1917-20                                  | NK                                                                                                          | 100                                                                                             |
|                                                    |                                                      |                                                                   | 1924-27                                  | NK                                                                                                          | 100                                                                                             |
| Higginson 1962 (12)                                | USA, Kansas City                                     | Tumour Registry, Kansas Medical Center                            | 1947-59                                  | BC patients (also other cancers)                                                                            | 644                                                                                             |
| Dennis et al., 1975 (15)                           | USA, New York                                        | State University Hospital-Kings County Hospital Center            | 1965-70                                  | BC patients who underwent a radical mastectomy                                                              | 237                                                                                             |
| Wilkinson et al., 1979 (13)                        | USA, Western New York state & Northwest Pennsylvania | Network of hospital-based tumour registry                         | 1969-1979                                | Women with a newly-diagnosed and histologically confirmed BC                                                | 1784                                                                                            |
| Elwood & Moorehead, 1980 (14)                      | Canada, British Columbia                             | Cancer referral centre                                            | 1945 & 1950 (combined due to small nos.) | Histologically confirmed BC                                                                                 | 109                                                                                             |
|                                                    |                                                      |                                                                   | 1955                                     |                                                                                                             | 134                                                                                             |
|                                                    |                                                      |                                                                   | 1960                                     |                                                                                                             | 231                                                                                             |
|                                                    |                                                      |                                                                   | 1965                                     |                                                                                                             | 265                                                                                             |
|                                                    |                                                      |                                                                   | 1970                                     |                                                                                                             | 347                                                                                             |
|                                                    |                                                      |                                                                   | 1975                                     |                                                                                                             | 459                                                                                             |
|                                                    |                                                      |                                                                   | All                                      |                                                                                                             | 1545                                                                                            |
| Butlar & Templeton, 1983 (16)                      | USA, Massachusetts                                   | Hospital                                                          | 1967-78                                  | BC patients with known tumour size                                                                          | 569                                                                                             |
| Feldman et al., 1983 (17)                          | USA, N York                                          | Series 1: Brooklyn Breast Cancer Demonstration Network            | Series 1: 1975-79                        | Series 1: BC patients with a self-detected mass who were diagnosed or initially treated in the 15 hospitals | Series 1: 664                                                                                   |
|                                                    |                                                      | Series 2: Downstate Medical Center & Kings County Hospital Center | Series 2: 1967-77                        |                                                                                                             | Series 2: Newly diagnosed BC patients (regardless of whether they presented with a breast mass) |
| Gregorio et al., 1983 (27)                         | USA, New York                                        | Roswell Park Memorial Institute                                   | 1957-65                                  | Women admitted with BC                                                                                      | Whites: 156;<br>Blacks: 55                                                                      |

| Author, yr. of publication (ref. no.) <sup>a</sup> | Country/region                                                          | Setting                                                                             | Year of study        | Eligibility criteria                                                                                                                                                         | Sample size                  |
|----------------------------------------------------|-------------------------------------------------------------------------|-------------------------------------------------------------------------------------|----------------------|------------------------------------------------------------------------------------------------------------------------------------------------------------------------------|------------------------------|
| Vernon et al., 1985 (19)                           | USA, Texas                                                              | University of Texas System Cancer Center, MD Anderson Hospital and Cancer Institute | 1949-68              | All female patients with a histologically confirmed BC                                                                                                                       | Whites: 1433;<br>Blacks: 445 |
| Huguley et al., 1988 (18)                          | USA, Georgia                                                            | Network of 14 hospitals in Georgia                                                  | 1975-79              | Newly diagnosed BC patients                                                                                                                                                  | 2083                         |
| Freeman & Wasfie, 1989 (20)                        | USA, Harlem, NY                                                         | Harlem Hospital Center                                                              | 1964-1986            | Consecutive Black women with BC who were diagnosed, treated or followed in the study hospital                                                                                | 193                          |
| Coates et al., 1992 (21); Hunter al., 1993 (22)    | USA, metropolitan areas of Atlanta, New Orleans, San Francisco, Oakland | Hospital pathology records                                                          | 1985-86              | Black and White women aged 20-79 years resident in the study areas with a newly-diagnosed invasive BC and with no previous history of cancer except non-melanoma skin cancer | Black: 410;<br>White: 325    |
| Caplan et al., 1995 (23)                           | USA, metropolitan areas of Atlanta, New Orleans, San Francisco, Oakland | Hospital pathology reports                                                          | 1985-86              | Newly diagnosed invasive BC patients                                                                                                                                         | Black: 519;<br>White: 477    |
| Rayson et al., 2004 (24)                           | Canada, Nova Scotia                                                     | Nova Scotia Cancer registry (population-based)                                      | 1999-2000            | Newly-diagnosed invasive BC patients                                                                                                                                         | 245                          |
| Gorin et al., 2006 (25)                            | USA, 11 SEER catchment populations                                      | Population-based cancer registry                                                    | 1992-1999            | Newly-diagnosed and histologically-confirmed BC patients                                                                                                                     | Whites: 43,627;<br>B: 2,982  |
| Partridge et al., 2012 (26)                        | USA                                                                     | 8 National Comprehensive Cancer Network centres                                     | 2000-2007            | Newly-diagnosed BC patients                                                                                                                                                  | 21,818                       |
| <b>SUB-SAHARAN AFRICA</b>                          |                                                                         |                                                                                     |                      |                                                                                                                                                                              |                              |
| Ly et al., 2002 (29)                               | Mali, Bamako                                                            | Hôpital du Point-G                                                                  | 1998-2000            | Newly diagnosed and histologically-confirmed BC patients seen at the haematology/oncology service                                                                            | 44 (43 females)              |
| Clegg-Lampsey et al, 2009 (30)                     | Ghana, Accra                                                            | Korle Bu Teaching Hospital                                                          | 2007 -2008           | Newly diagnosed BC patients                                                                                                                                                  | 66                           |
| Ezeome, 2010 (31)                                  | Nigeria, Enugu                                                          | University of Nigeria Teaching Hospital                                             | 1999-2001; 2003-2005 | BC patients managed at the Surgical Oncology Unit in the hospital                                                                                                            | 162                          |

| Author, yr. of publication (ref. no.) <sup>a</sup> | Country/region                       | Setting                                                                                                          | Year of study | Eligibility criteria                                                                                                                   | Sample size |
|----------------------------------------------------|--------------------------------------|------------------------------------------------------------------------------------------------------------------|---------------|----------------------------------------------------------------------------------------------------------------------------------------|-------------|
| Ibrahim & Oludara, 2012 (32)                       | Nigeria, Lagos                       | Lagos State University Teaching Hospital                                                                         | 2009-2010     | BC patients referred to one of the general surgery outpatient clinics in the hospital                                                  | 201         |
| Price et al., 2012 (33)                            | Cameroon, Yaoundé                    | Yaoundé General Hospital                                                                                         | 2010          | Patients aged ≥18 yrs. with primary invasive BC and who received chemotherapy                                                          | 50          |
| Toure et al., 2013 (34)                            | Côte d'Ivoire, Abidjan               | University Hospital of Treichville                                                                               | 2008-2011     | Patients with a histologically confirmed adenocarcinoma of the breast                                                                  | 350         |
| Marcus et al., 2013 (35)                           | South Africa, south Gauteng          | Sebokeng Hospital                                                                                                | 2007-2010     | Patients presenting at the breast clinic with advanced BC (IIB or higher)                                                              | 103         |
| Pace et al., 2015 (36)                             | Rwanda, Northern & Eastern provinces | Butaro and Rwinkwavu rural hospitals                                                                             | 2012-2014     | Women aged ≥21 yrs. with pathologically confirmed BC (excluded women diagnosed elsewhere >6 months previously without initial staging) | 144         |
| Brinton et al. 2017 (37)                           | Ghana, Accra & Kumasi                | Korle Bu Teaching Hospital (Accra), Komfo Anoyke Teaching Hospital (Kumasi) and Peace and Love Hospital (Kumasi) | ~2014         | Women aged 18-74 years resident in the hospital catchment areas diagnosed with a pathologically-confirmed BC                           | 1184        |
| Joffe et al., 2018 (38)                            | South Africa, Soweto                 | Chris Hani Baragwanath Academic Hospital                                                                         | 2015-2016     | Patients aged 18+ yrs. newly-diagnosed with BC (stages 0-IV)                                                                           | 499         |

BC: breast cancer

<sup>a</sup> Ref. numbers as in the reference list provided in the paper

**Supplementary Figure 1.** Comparison of the lengths of the diagnostic journey for ABC-DO women with published estimates from North America, a high-income region with a sizeable Black population, and sub-Saharan Africa. Notes: Av: average; d: days; IQR: inter-quartile range; Md: median; mths: months; wMe: weighted mean. A dashed line indicates that the estimate shown in the figure is an underestimation of the median value (the latter could not be calculated from data provided in the original article).

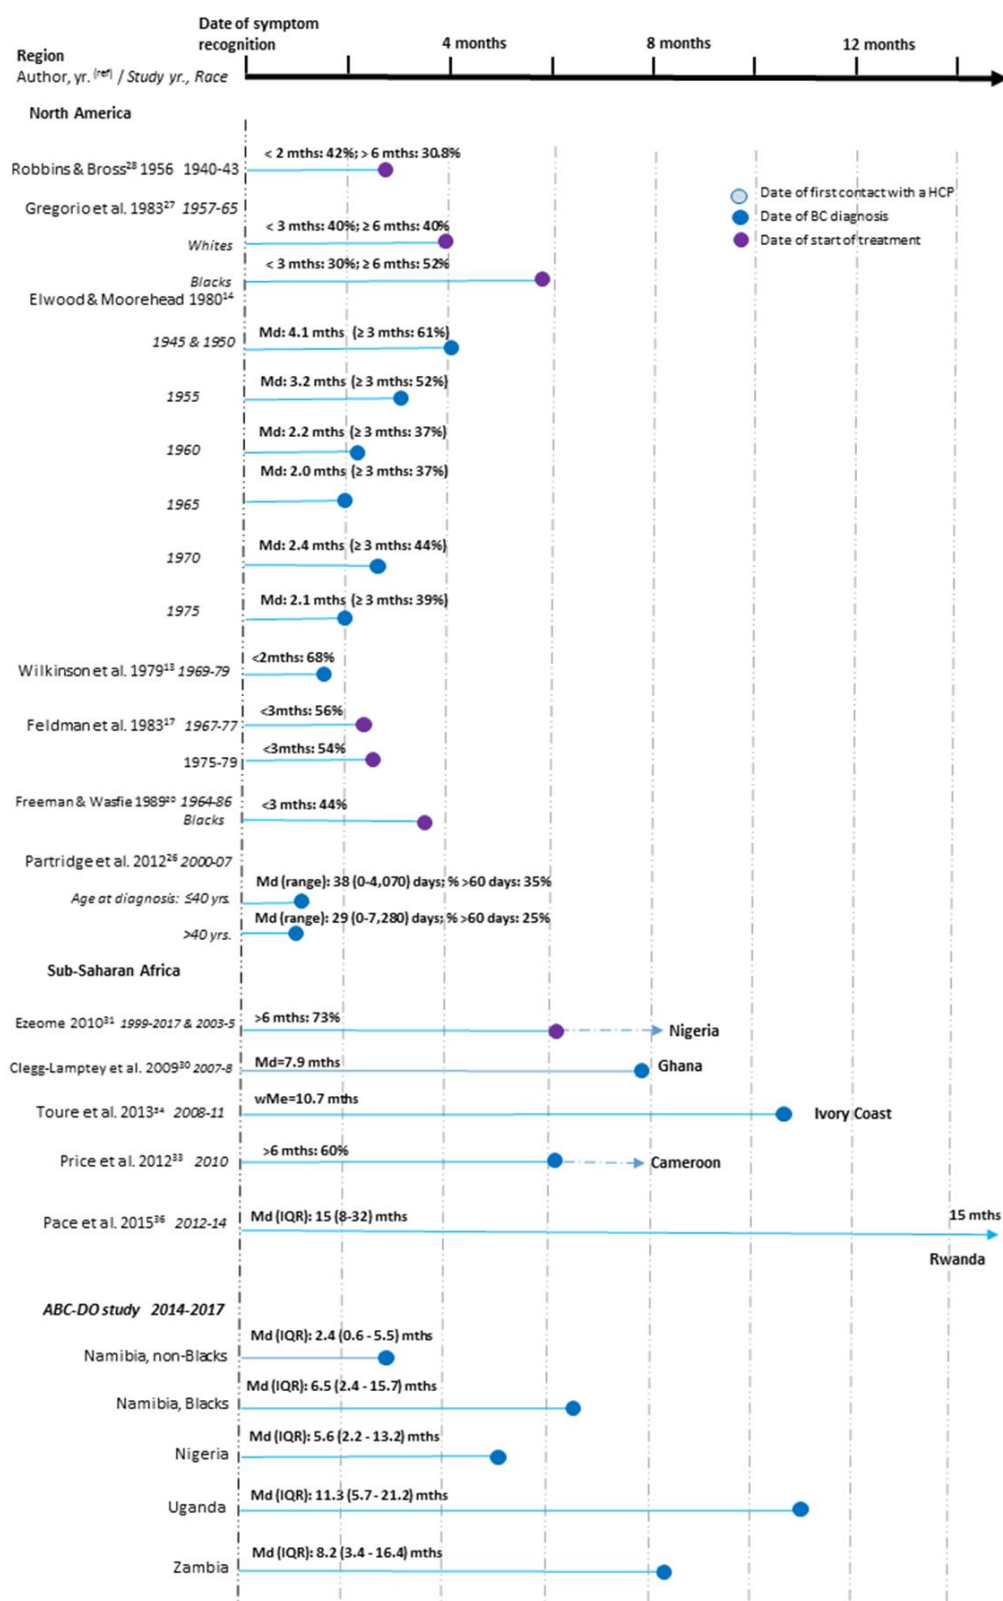

**Supplementary Figure 2.** Comparison of the lengths of the pre-contact interval in the ABC-DO study populations with published estimates from North America, a high-income region with a sizeable Black population, and from sub-Saharan Africa. Notes: Av: average; d: days; IQR: inter-quartile range; Md: median; mths: months; wMe: weighted mean. Reference numbers as in the reference list of the paper.

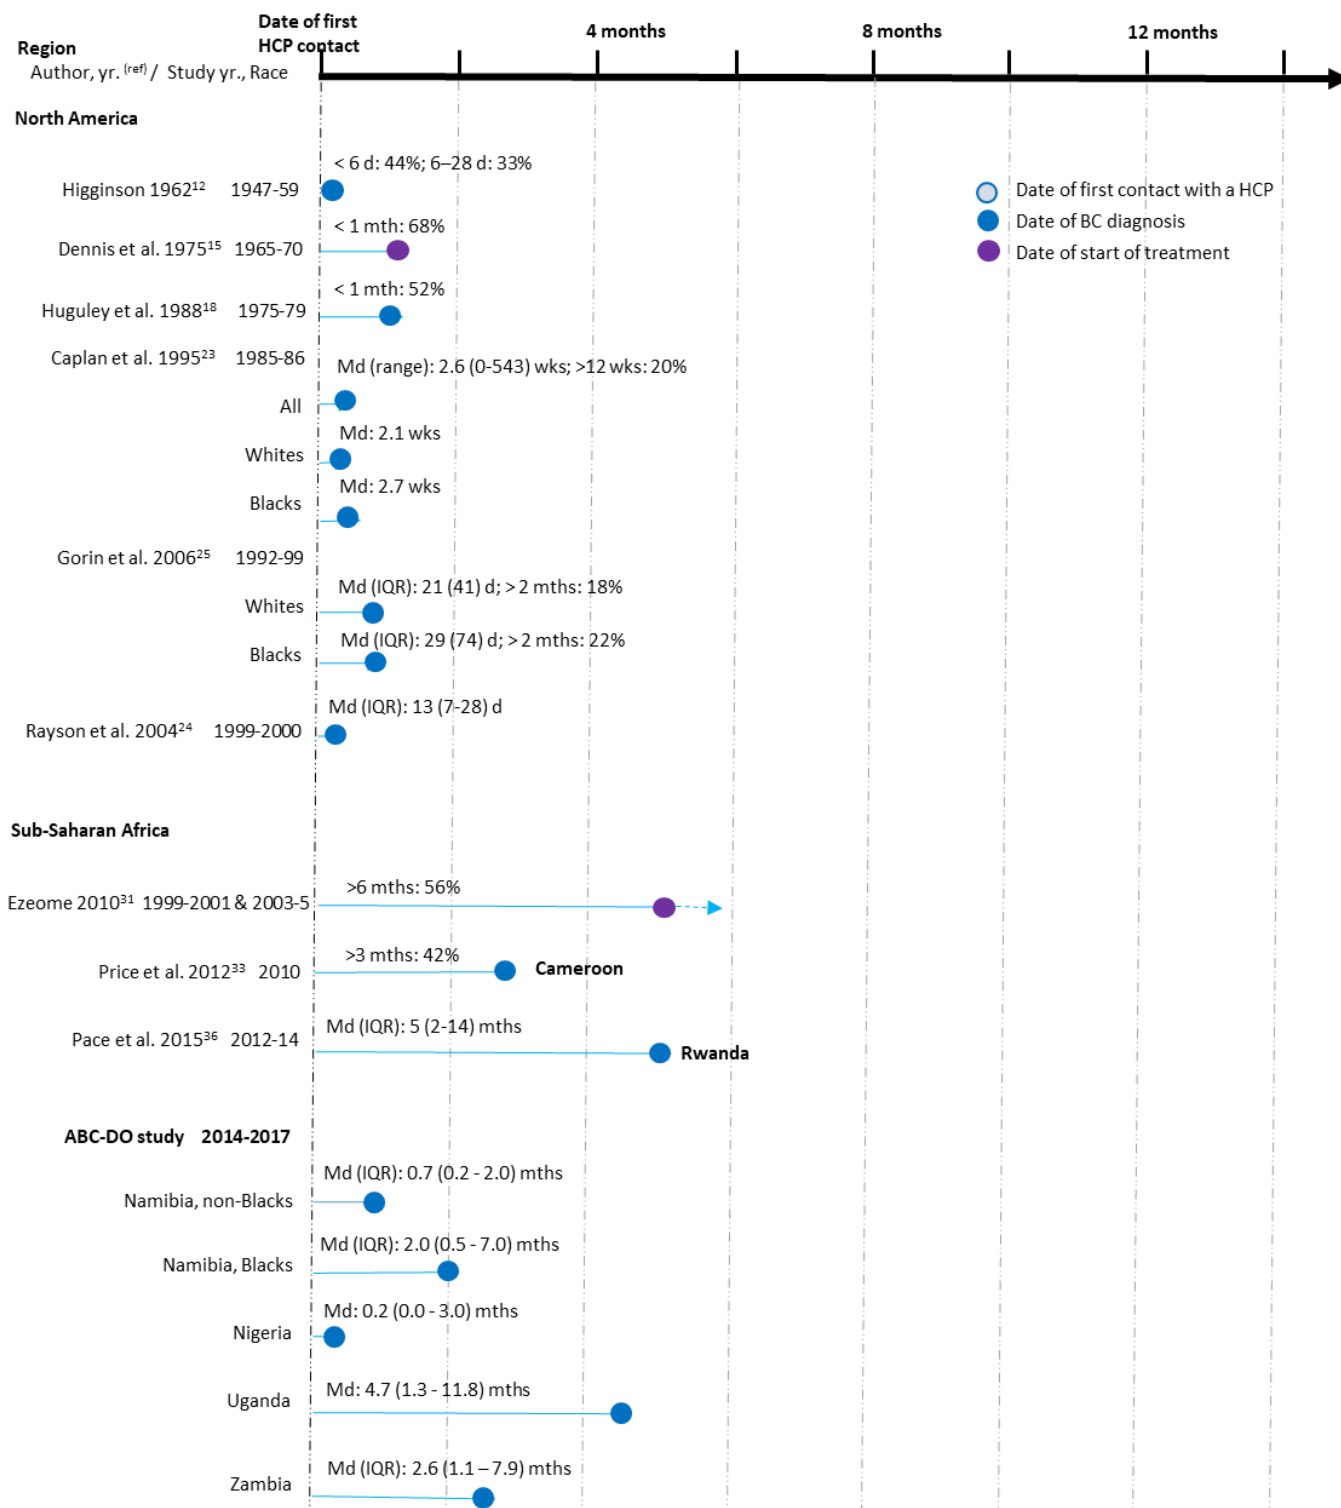

**Supplementary Figure 3.** Comparison of the lengths of the post-contact interval in the ABC-DO study populations with published estimates from North America, a high-income region with a sizeable Black population, and from sub-Saharan Africa. Notes: Av: average; d: days; IQR: inter-quartile range; Md: median; mths: months; wks: weeks. Reference numbers as in the reference list of the paper. A dashed line indicates that the estimate shown in the figure is an underestimation of the median value (the latter could not be calculated from data provided in the original article).

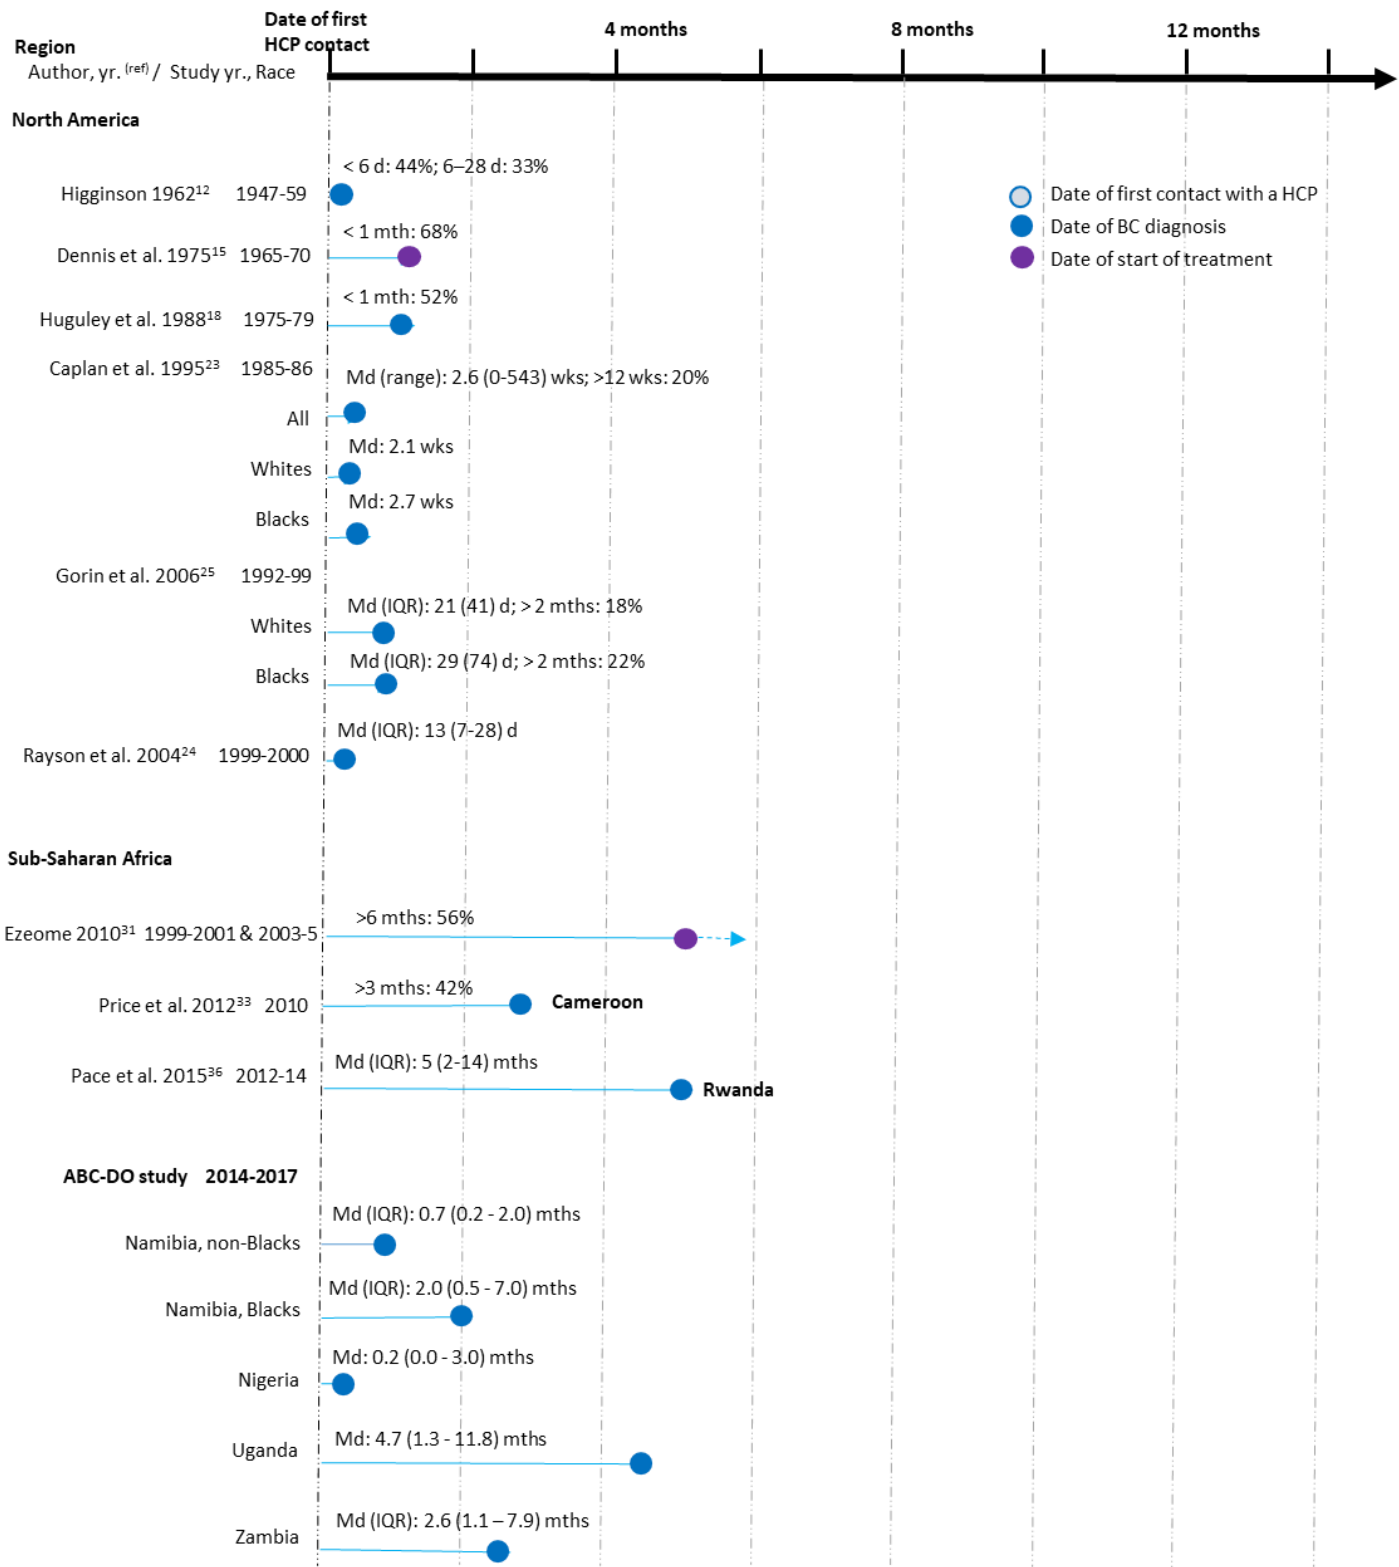

Supplement: IJC-148-340-s001.pdf [file IJC-148-340-s001.pdf]
